# Supplementary material for: Multifaceted SlyD from Helicobacter pylori: implication in [NiFe] hydrogenase maturation
Source: PubMed Central journal article supplement — J Biol Inorg Chem. 2011 Nov 2;17(3):331–43. doi: 10.1007/s00775-011-0855-y (PMC3292732; doi:10.1007/s00775-011-0855-y), 2011-11-02
Supplement: 775_2011_855_MOESM1_ESM.pdf [file 775_2011_855_MOESM1_ESM.pdf]

*Supplementary Information*

**Multifaceted SlyD from *Helicobacter pylori*: implication in [NiFe]  
hydrogenase maturation**

Tianfan Cheng<sup>1</sup>, Hongyan Li<sup>1</sup>, Wei Xia and Hongzhe Sun (e-mail: hsun@hku.hk)

Department of Chemistry, The University of Hong Kong, Pokfulam Road, Hong  
Kong S.A.R., P.R. China

<sup>1</sup>These authors contributed equally to the study.

### **Circular dichroism**

About 10  $\mu\text{M}$  of proteins were freshly prepared in 10 mM potassium phosphate buffer containing 50 mM  $(\text{NH}_4)_2\text{SO}_4$  at pH 7.4. CD experiments were carried out on a JASCO J-815 circular dichroism spectrometer using a quartz cuvette with a path length of 1 mm at room temperature and scanned from 190 to 260 nm at the speed of 50 nm/min with a data interval of 0.2 nm. Each spectrum was averaged from five scans with baseline subtracted. The secondary structure fractions were estimated by the CDNN software package [1]. For thermal denaturation, 2  $\mu\text{M}$  of proteins were used in a 10-mm quartz cuvette with heating and cooling rate of 1  $^\circ\text{C}/\text{min}$ .

### **PPIase activity**

RCM-T1 was used for determination of PPIase activity as previously described [2] with some modification. *E. coli* strain DH5 $\alpha$  cells harboring pT1LE (a modified plasmid of pA2T1-1 [3], kindly granted by U. Hahn, Universität Hamburg) was used with site-directed mutagenesis (generating pT1LE-S54G/P55N) for expressing (S54G, P55N)-RNase T1. (S54G, P55N)-RNase T1 was expressed and purified accordingly [3]. RCM-T1 was prepared as previously described [4]. Progress of refolding of 0.3  $\mu\text{M}$  RCM-T1 in the absence and presence of *HpSlyD* and its variants at ambient temperature (20  $^\circ\text{C}$ ) was followed by the increase of fluorescence at 320 nm after excitation at 268 nm on a Hitachi F-7000 fluorescence spectrophotometer.

### **Chaperone activity**

DTT-induced insulin aggregation assay was performed to determine the chaperone activity according to a previously described method [5, 6] with minor modification. The insulin solution was diluted to a final concentration of 45  $\mu\text{M}$  in 50 mM  $\text{Na}_2\text{HPO}_4$ , 100 mM NaCl (pH 7.5) and mixed with *HpSlyD* and its variants at 25  $^\circ\text{C}$ . The aggregation process was monitored by the increase in scattered light at 400 nm on a Hitachi F-7000 fluorescence spectrophotometer.

**Table S1** Primers and plasmids used in this study

## (A) Primers used in this study

| Name                  | Sequence (5'-3')                                    | Enzyme |
|-----------------------|-----------------------------------------------------|--------|
| HpSlyD-for            | GGAATTCCATATGCAAAACCATGATTTAGAG                     | NdeI   |
| HpSlyD-rev            | CGGAATTCCTACCCATGCGAACATGAGCA                       | EcoRI  |
| HpSlyD $\Delta$ C-rev | CGGAATTCCTATTCTTCTTCGCTCACTTCCCT                    | EcoRI  |
| $\Delta$ IF-1         | GTGGGATGATGCCTGGGTGCCAGTGGCCCCATAAGCTTCCTCTGG       |        |
| $\Delta$ IF-2         | GCACCCAGGCATCATCCCACCACATGCCACTTTAGCGTTTCGTTTCAAGGT |        |
| MalE-SPless           | GGAATTCCATATGAAAATCGAAGAAGGTAAA                     | NdeI   |
| MalE-Xa               | CGGAATTCCTGAAATCCTTCCCTCGAT                         | EcoRI  |
| HydA-SP-up            | CGGAATTCATGTTCTACGATGAAA                            | EcoRI  |
| HydA-SP-down          | CCGCTCGAGCGCCTTCAAAGTCAAG                           | XhoI   |

## (B) Plasmids used and constructed in this study

| Name                                   | Purpose                                          | Source     |
|----------------------------------------|--------------------------------------------------|------------|
| pET32-HpSlyD                           | Express HpSlyD                                   | This study |
| pET32-HpSlyD $\Delta$ C                | Express HpSlyD $\Delta$ C                        | This study |
| pET32-HpSlyD<br>$\Delta$ IF            | Express HpSlyD $\Delta$ IF                       | This study |
| pET32-HpSlyD<br>$\Delta$ IF $\Delta$ C | Express HpSlyD $\Delta$ IF $\Delta$ C            | This study |
| pETMalE                                | Intermediate plasmid for constructing pETMalEHis | This study |
| pETMalEHis                             | Express $\Phi$ MalE::H6                          | This study |
| pETMalE-HydASP                         | Express $\Phi$ MalE::HydASP-H6                   | This study |
| pET32a(+)                              | Expression plasmid vector                        | Novagen    |
| pMAL-p2x                               | Amplification of a signal peptide-less MBP       | NEB        |

**Table S2** Thermal stability parameters and PPIase activities of *HpSlyD* and its variants

(A) PPIase activity data obtained from the refolding of RCM-T1 at 20 °C

|                                      | $k_{\text{cat}}/K_m$ ( $\text{M}^{-1} \text{s}^{-1}$ ) | % <sup>*</sup> |
|--------------------------------------|--------------------------------------------------------|----------------|
| <i>HpSlyD</i>                        | $1.17 \pm 0.05 \times 10^6$                            | 100            |
| <i>HpSlyD</i> $\Delta$ C             | $0.94 \pm 0.05 \times 10^6$                            | 80             |
| <i>HpSlyD</i> $\Delta$ IF            | $4.4 \pm 0.3 \times 10^3$                              | 0.4            |
| <i>HpSlyD</i> $\Delta$ IF $\Delta$ C | $1.2 \pm 0.3 \times 10^3$                              | 0.1            |

<sup>\*</sup> %: the percentage of remaining PPIase activity ( $k_{\text{cat}}/K_m$ ) of variants compared with wild-type *HpSlyD*

(B) Inhibition of PPIase activity *HpSlyD* by two immunosuppressive agents at different concentrations <sup>‡</sup>

|           | Conc. ( $\mu\text{M}$ ) | 1   | 10  |
|-----------|-------------------------|-----|-----|
| FK506     |                         | 97% | 60% |
| Rapamycin |                         | 82% | 24% |

<sup>‡</sup> Compared with  $k_{\text{app}}$  of 20 nM *HpSlyD*

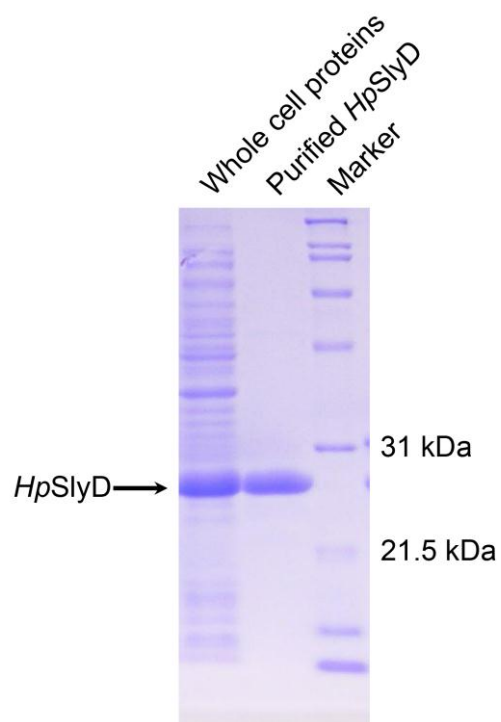

**Fig. S1** Expression and purification of *HpSlyD*

*HpSlyD* expressed in KMI603 *E. coli* cells harboring pET32-*HpSlyD* was purified into homogeneity by a three-step procedure. *HpSlyD* shows a larger apparent molecular mass of about 25 kDa than theoretical value of 20 kDa.

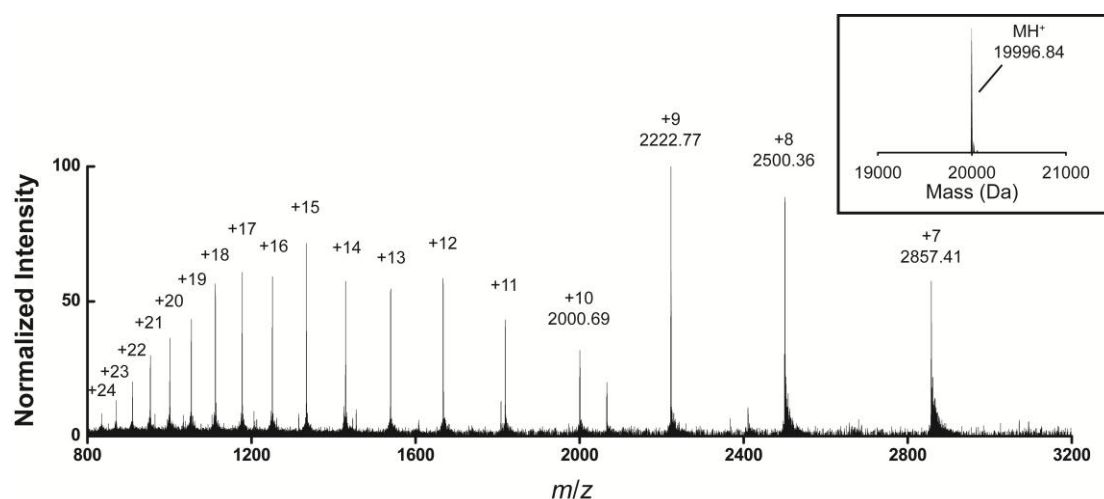

**Fig. S2** The determination of the molecular weight of *HpSlyD* by ESI-MS

The mass spectra of about 50  $\mu\text{M}$  *HpSlyD* in 10 mM ammonium acetate, pH6.4 were obtained on a LTQ Orbitrap Velos mass spectrometer (Thermo Scientific, USA) equipped with an electrospray source in positive mode. Mass range scanned from  $m/z$  200-4000 Da at resolution of 60000 with total accumulation time of 2 to 3 minutes. The instrument parameters are as follow: ion spray voltage 4.0 kV, sheath gas ( $\text{N}_2$ ) flow rate at 6 arbitrary units, ion source temperature 275  $^{\circ}\text{C}$ . The spectra were deconvoluted with the raw data range from  $m/z$  800-3200 Da, with the threshold of resolution of 40000 and signal to noise ratio of 10. For the peaks of *HpSlyD* with  $m/z > 2000$ , both charges and  $m/z$  are labeled, otherwise, only charges are labeled. The molecular weight ( $\text{MH}^+$ ) was obtained from the deconvoluted result as shown in inset.

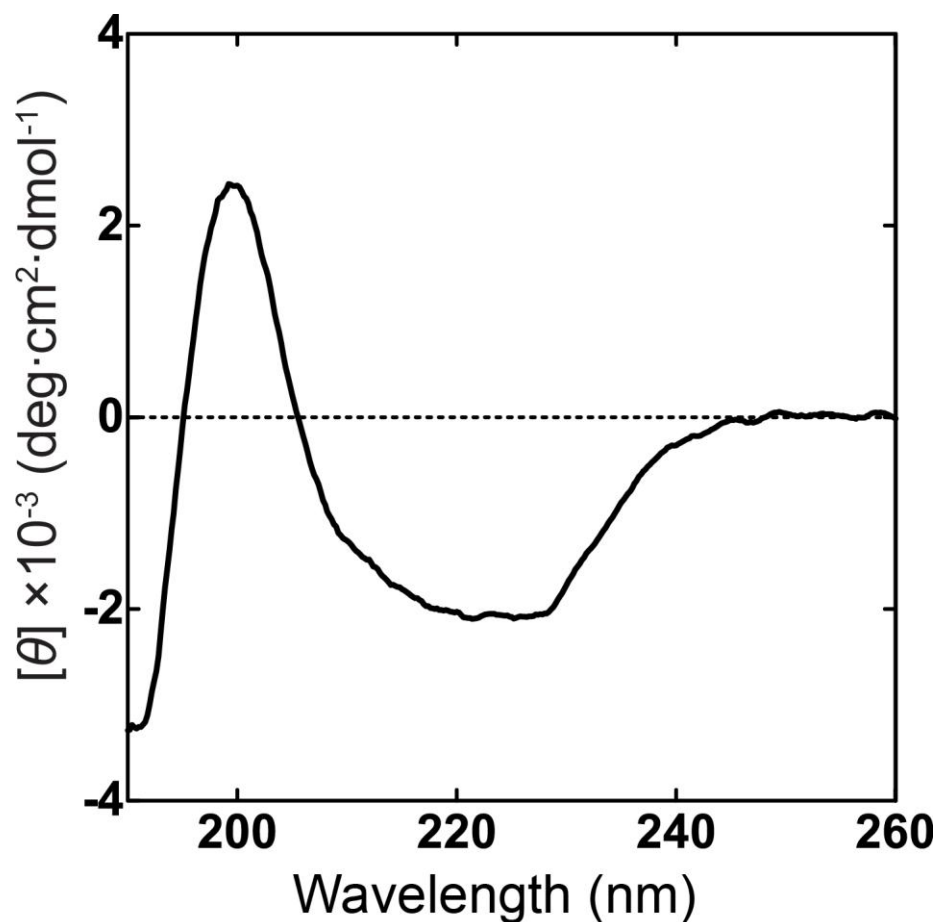

**Fig. S3** CD spectrum of 10  $\mu\text{M}$  *HpSlyD* in 10 mM potassium phosphate, 50 mM  $(\text{NH}_4)_2\text{SO}_4$  at pH 7.4

The spectrum was obtained from the average of five scans and smoothed using Savitzky–Golay method with 25 points of window on a Spectra Manager II software of JASCO.

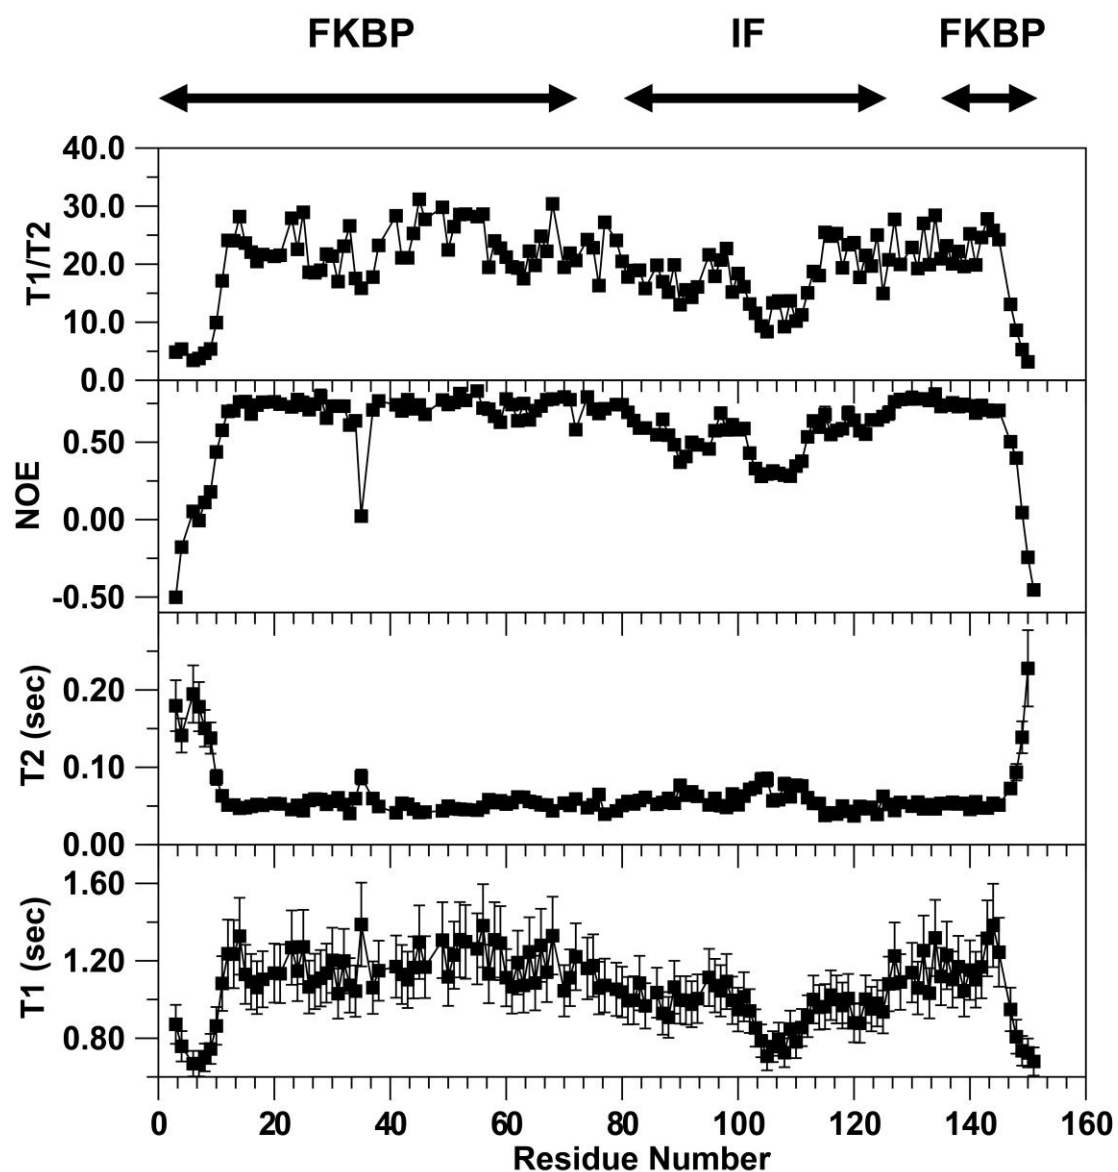

**Fig. S4**  $^{15}\text{N}$  backbone amide relaxation parameters of *HpSlyD* $\Delta\text{C}$

The values of  $T_1$ ,  $T_2$  and proton-irradiated NOE for individual residues are shown as a function of residue number in the protein sequence.



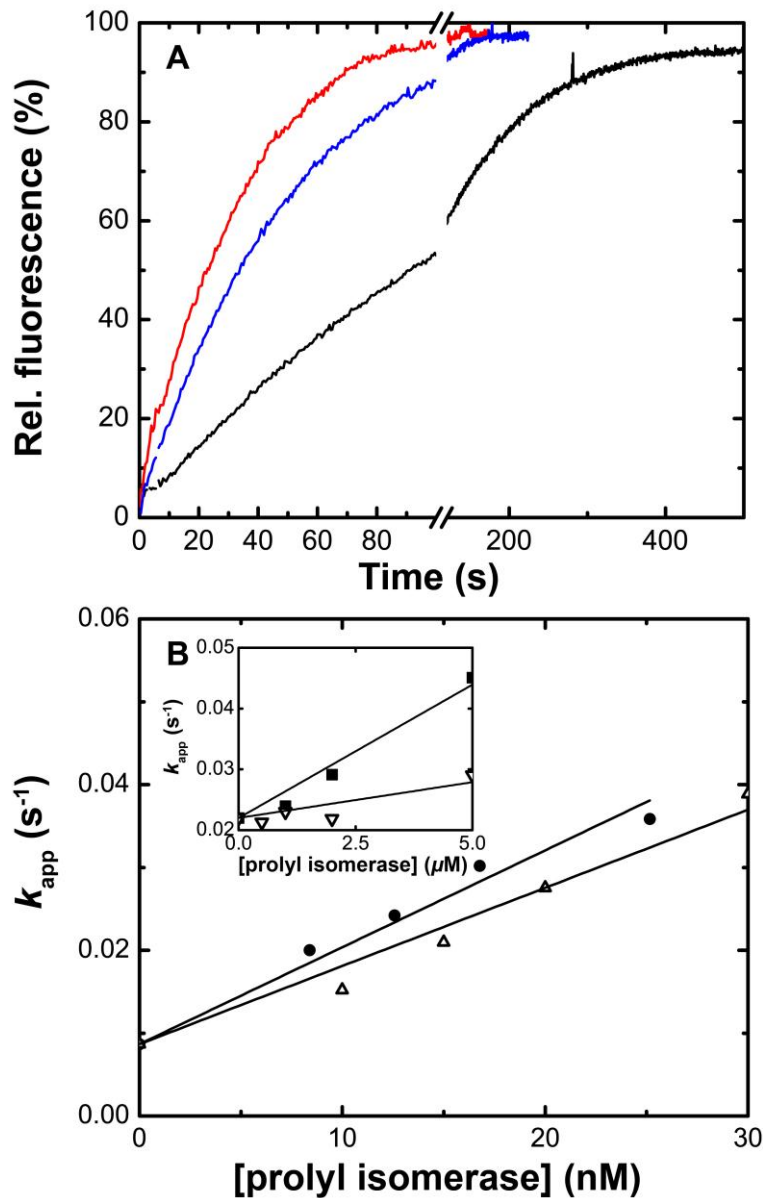

**Fig. S5** PPIase activities of *HpSlyD* and its variants

(a) The progress curves of refolding of 0.3  $\mu M$  RCM-T1 at 20  $^{\circ}C$  in the absence (black) and presence of 20 nM *HpSlyD* (red) and 15 nM *HpSlyD* $\Delta C$  (blue). (b) Catalytic efficiencies of refolding 0.3  $\mu M$  RCM-T1. The measured rate constants  $k_{app}$  of RCM-T1 folding are shown as function of *HpSlyD* ( $\bullet$ ), *HpSlyD* $\Delta C$  ( $\Delta$ ), *HpSlyD* $\Delta I F$  ( $\blacksquare$ ) and *HpSlyD* $\Delta I F \Delta C$  ( $\nabla$ ). The  $k_{cat}/K_m$  values obtained from the slopes are listed in Table S2a.

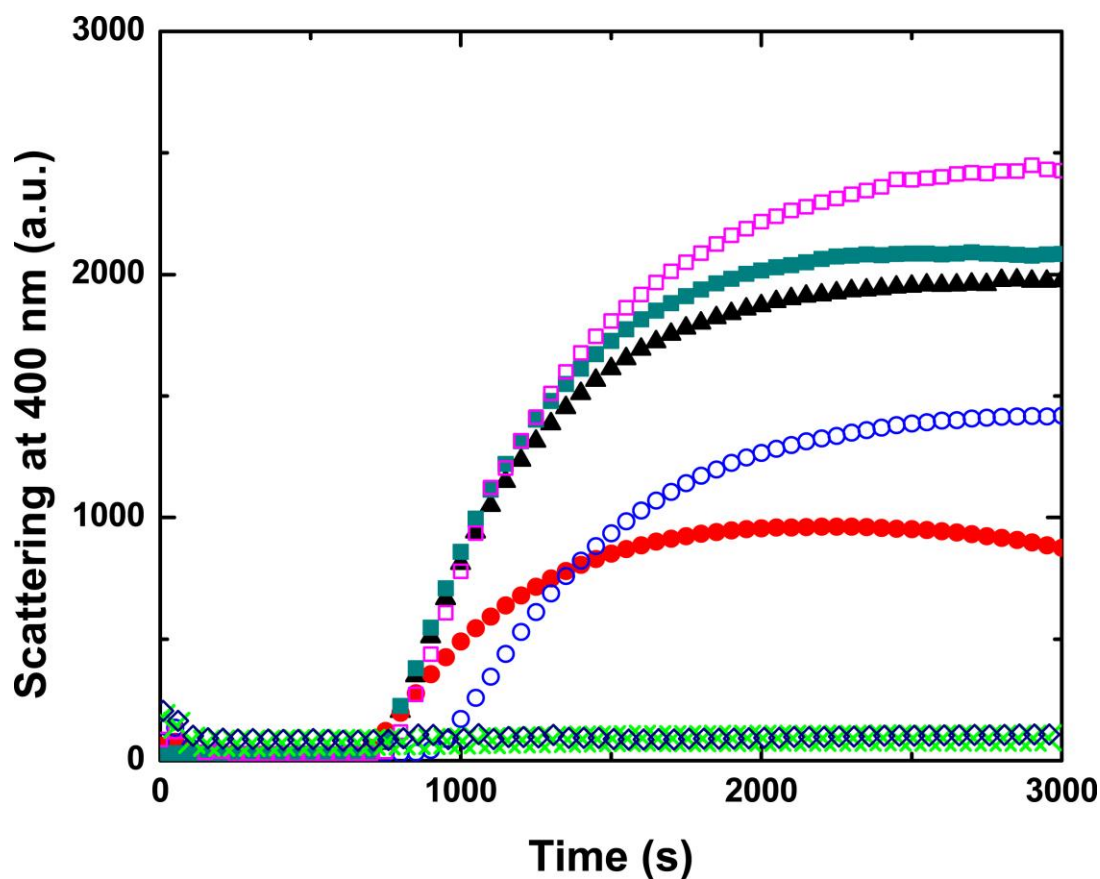

**Fig. S6** Chaperone properties of *HpSlyD* and its variants

The chaperone activities were demonstrated using DTT-induced insulin aggregation assay at 25 °C. The aggregation of insulin was monitored by the increase in light scattering at 400 nm. The progress curves of 45  $\mu$ M insulin in the absence of *HpSlyD* ( $\blacktriangle$ ) and presence of 20  $\mu$ M of *HpSlyD* ( $\bullet$ ), *HpSlyD* $\Delta$ C ( $\circ$ ), *HpSlyD* $\Delta$ IF ( $\blacksquare$ ) and *HpSlyD* $\Delta$ IF $\Delta$ C ( $\square$ ), and 45  $\mu$ M of *HpSlyD* ( $\times$ ) and *HpSlyD* $\Delta$ C ( $\diamond$ ).

## References

1. Böhm G, Muhr R, Jaenicke R (1992) *Protein Eng* 5:191-195
2. Scholz C, Stoller G, Zarnt T, Fischer G, Schmid FX (1997) *EMBO J* 16:54-58
3. Quaas R, McKeown Y, Stanssens P, Frank R, Blöcker H, Hahn U (1988) *Eur J Biochem* 173:617-622
4. Pace CN, Grimsley GR, Thomson JA, Barnett BJ (1988) *J Biol Chem* 263:11820-11825
5. Haslbeck M, Walke S, Stromer T, Ehrnsperger M, White HE, Chen SX, Saibil HR, Buchner J (1999) *EMBO J* 18:6744-6751
6. Löw C, Neumann P, Tidow H, Weininger U, Haupt C, Friedrich-Epler B, Scholz C, Stubbs MT, Balbach J (2010) *J Mol Biol* 398:375-390
